# Supplementary material for: Plastidic phosphoglucomutase and ADP-glucose pyrophosphorylase mutants impair starch synthesis in rice pollen grains and cause male sterility
Source: PubMed Central journal article supplement (PMC5049399; doi:10.1093/jxb/erw324), 2016-09-01
Supplement: supp_erw324_Supplementary_Figures_S1_S3_Table_S1.pdf [file supp_erw324_Supplementary_Figures_S1_S3_Table_S1.pdf]

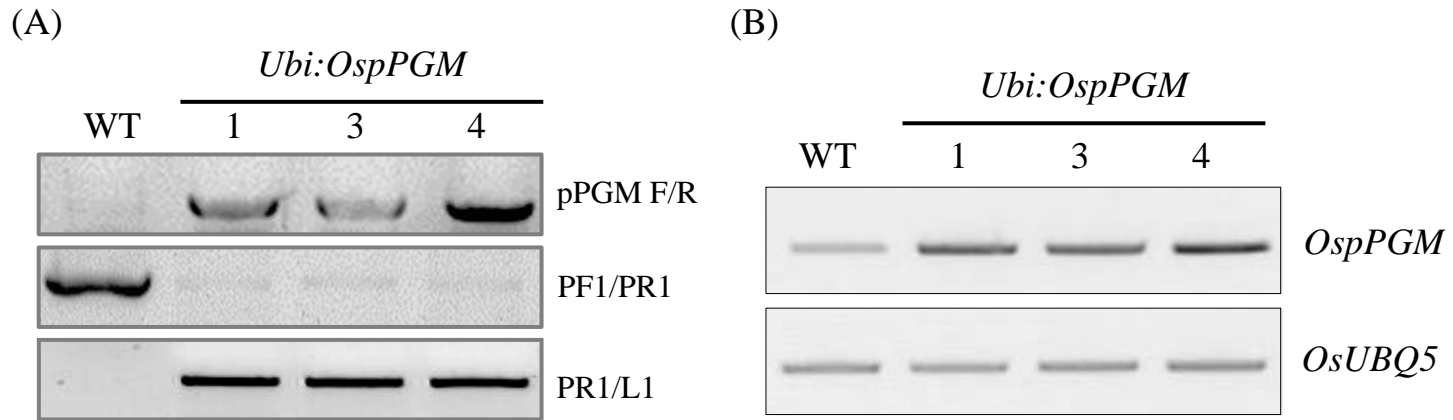

**Fig. S1.** Genomic DNA PCR (A) and RT-PCR (B) analysis of genetically complemented lines of *osppgm-1* with wild type *OspPGM* copy under the control of the maize *Ubi1* promoter. pPGM F/R primer set is used for *OspPGM* cDNA, PF1/PR1 set for wild type genomic copy, and PR1/L1 set for T-DNA insertion. *OsUBQ5* was used as PCR control. WT, wild type

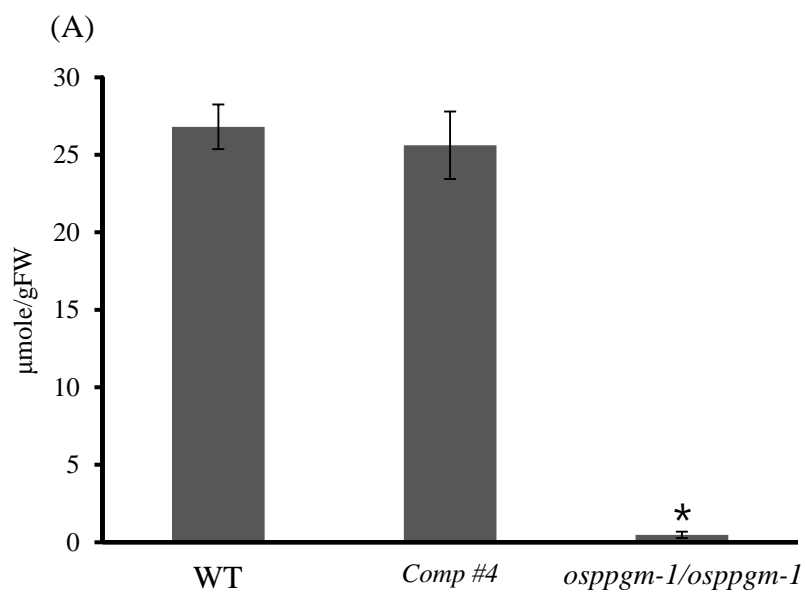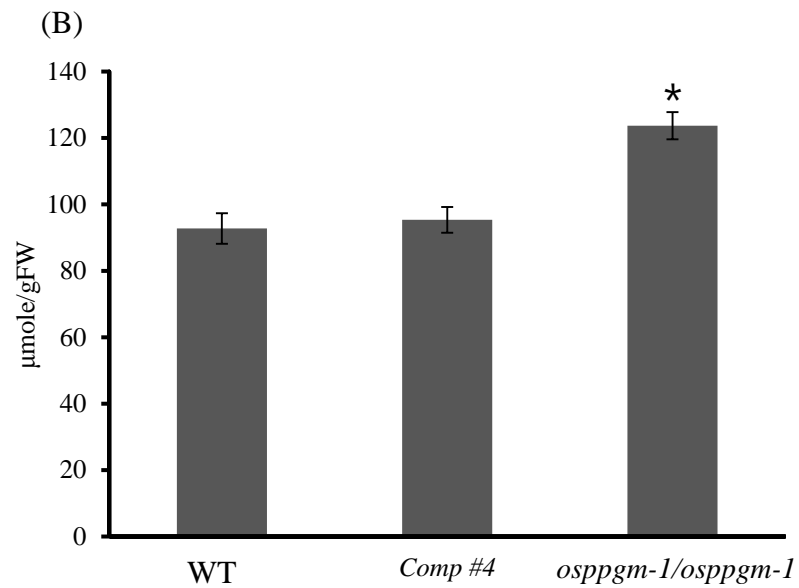

(C)

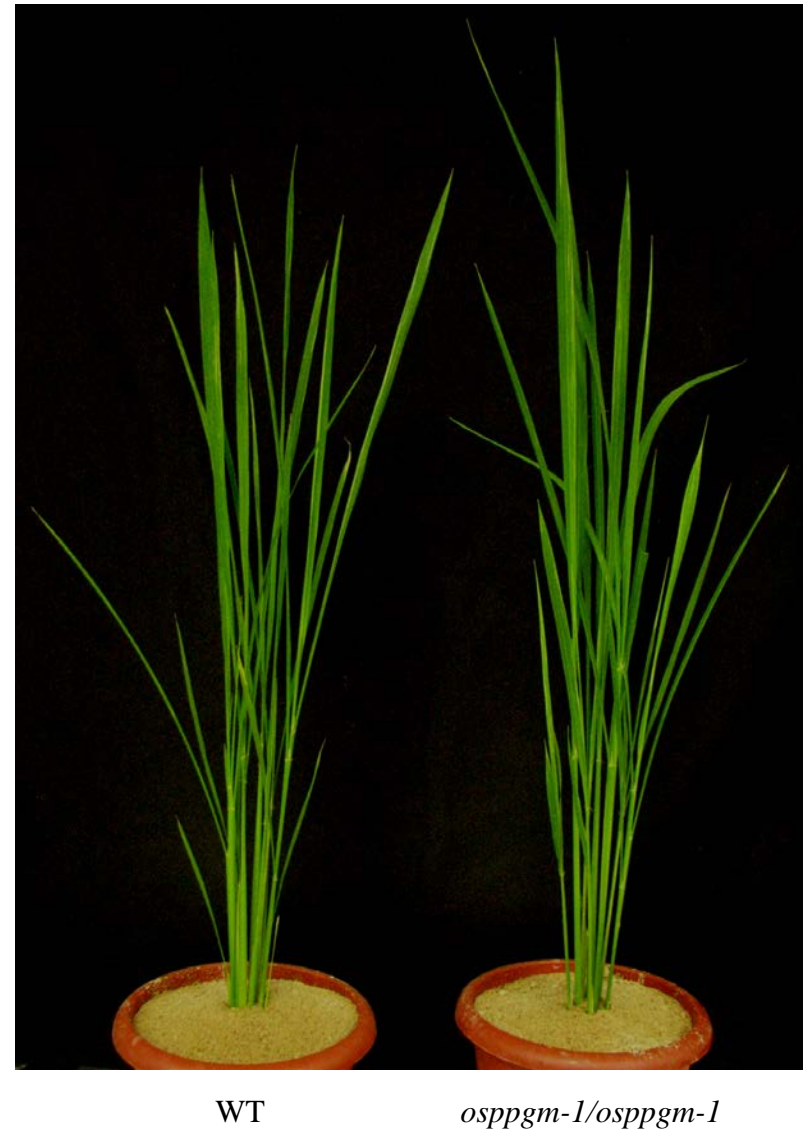

**Fig. S2.** Metabolite and phenotypic analysis of *osppgm-1/osppgm-1* mutant rice plant generated by anther culture. (A, B) Starch (A) and sucrose (B) contents in *osppgm-1/osppgm-1*, wild type and Comp #4 plants grown for 12 weeks. Each data point represents the mean ( $\pm$ SD) from at least three different plants. \*,  $P < 0.01$ . Second leaves from top of the plants harvested at the end of the day were analyzed. (C) Growth phenotype of eight-week-old plants grown in greenhouse conditions.

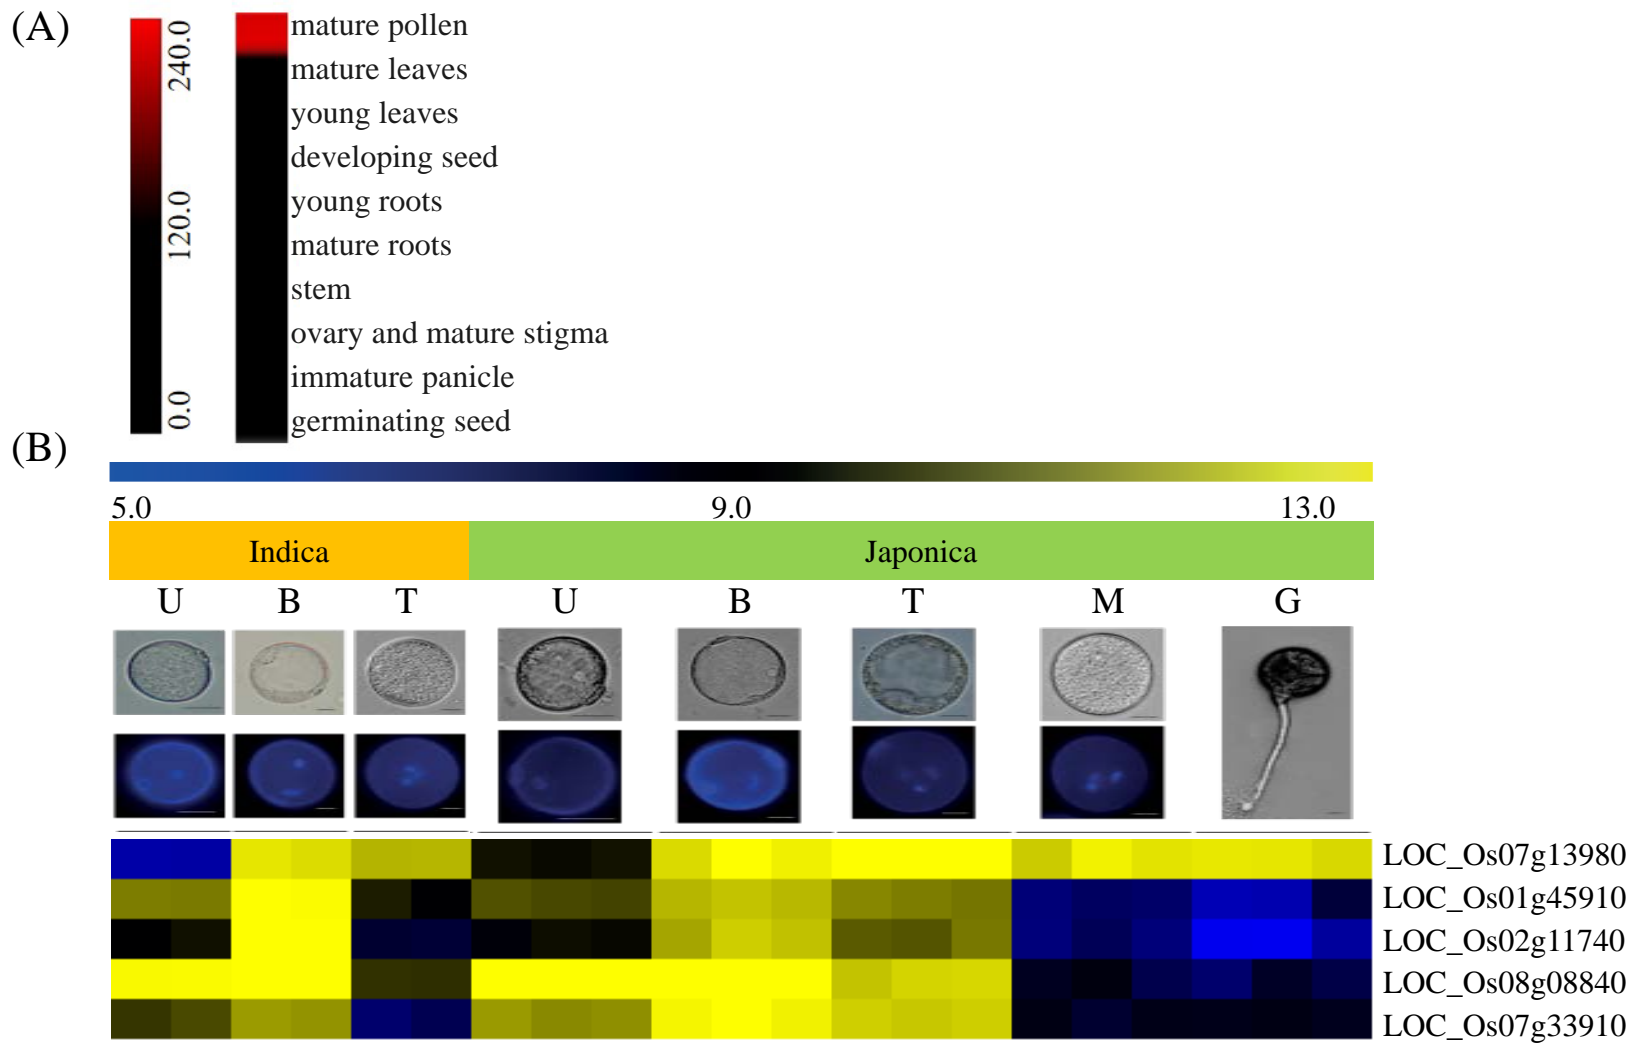

**Fig. S3.** Digital expression profile of *OsAGPL4*, the putative plastidic ATP/ADP translocator, and Glc-6-P/phosphate translocator genes. (A) Heat map generated with sum of abundance of *OsAGPL4* signatures (GATCAGAATCAACAAAG, GATCGAAATAAATACTG, and GATCTGAGTTCGACCTT) from the Rice MPSS database. (B) Heat map expression analysis of *OsAGPL4* (*LOC\_Os07g13980*), plastidic ATP/ADP translocator (*LOC\_Os01g45910* and *LOC\_Os02g11740*), and Glc-6-P/phosphate translocator (*LOC\_Os08g08840* and *LOC\_Os07g33910*) genes using Affymetrix rice microarray data prepared from developing pollens of indica and japonica varieties downloaded from NCBI GEO (Nguyen *et al.* 2016. Genome-wide identification and analysis of rice genes preferentially expressed in pollen at an early developmental stage. Plant Molecular Biology, doi:10.1007/s11103-016-0496-1). B, bicellular pollen; G, germinating pollen; M, mature pollen; T, tricellular pollen, U, unicellular pollen stage. Note: Of four Glc-6-P/phosphate translocators previously predicted by Toyota *et al.* (2006), *LOC\_Os07g34010* and *LOC\_Os07g33960* are no longer present in the most recent Rice Genome Annotation Project Release 7 data.

**Table S1.** List of PCR primers used in this study

| Names     | Primer sequence                |
|-----------|--------------------------------|
| OspPGM-F  | CTGCTCAGATTATCACTAAAATTG       |
| OspPGM-R  | AGAGCTAGGTCTATTAAAGGCTTC       |
| OscPGM-F  | ACGATATGACTATGAGAATGTTGA       |
| OscPGM-R  | AGATGTAAAAAGGCTATCAAACAG       |
| OsAGPL1-F | TTCCTTTTCTTGATCTCTCTTCTA       |
| OsAGPL1-R | CTCCTGACAAGATTAAAATGTGTT       |
| OsAGPL2-F | AGAGGTTGATGGAAAGATTGAATA       |
| OsAGPL2-R | CTGATCTCCACACAAGATTACAAC       |
| OsAGPL3-F | GCTAATAAACCAATGTACACATCA       |
| OsAGPL3-R | GATGACTAATCCATCTGCAATTAT       |
| OsAGPL4-F | GATATGGGAAC TTTTGGTTTG         |
| OsAGPL4-R | TGCAGTTTTCTACTTTCGTTG          |
| UBQ5-F    | GACTACAACATCCAGAAGGAGTC        |
| UBQ5-R    | TCATCTAATAACCAGTTCGATTTC       |
| PF1       | CTATGTAGAATAGCTGTTTTGCACCCAAC  |
| PR2       | TATAGCACTACGGGCATATTCTTCATTTG  |
| PF2       | TGCTGCTAGGAACCAAGAGTAAATCAATA  |
| PR2       | TCAAACACAAGATGAAATGGGAAATAAAC  |
| LF1       | TGCATATGT TAAATCATCCACGGTTTTAT |
| LR1       | ACCAATAACAGAGCGATCAACACTACATT  |
| G1        | ATCCAGACTGAATGCCCA             |
| L1        | CGATTTTTGAAATGCGAGAGCG         |
